# Supplementary material for: Rapid self-healing and triple stimuli responsiveness of a supramolecular polymer gel based on boron–catechol interactions in a novel water-soluble mussel-inspired copolymer
Source: Royal Society of Chemistry journal article supplement (doi:10.1039/c3py00788j), 2013-08-20
Supplement: c3py00788j.pdf [file c3py00788j.pdf]

## Supplementary Information

### “Rapid Self-Healing and Triple Stimuli Responsiveness of a Supramolecular Polymer Gel Based on Boron-Catechol Interactions in a Novel Water-Soluble Mussel-Inspired Copolymer”

Mohammad Vatankhah-Varnoosfaderani\*, Saud Hashmi, Amin GhavamiNejad, Florian J. Stadler\*

Chonbuk National University, School of Semiconductor and Chemical Engineering, Baekjero 567, Deokjin-gu, Jeonju, Jeonbuk, 561-756, Republic of Korea

Table 1 shows the comparison between  $^{13}\text{C}$ -NMR-peaks predicted depending on the neighboring monomers. The peaks given refer only to the centered monomer, marked bold. Peaks exhibiting a significant difference when in proximity to DMA vs. NIPMA are in bold numbers.

Table SI1. predicted  $^{13}\text{C}$ -NMR-peaks

| Name          | NNN         | NND         | Name | NDN         | NDD         |
|---------------|-------------|-------------|------|-------------|-------------|
| $\alpha$      | <b>38.5</b> | <b>36.5</b> | a    | <b>35.8</b> | <b>30.8</b> |
| $\beta$       | 173.4       | 173.4       | b    | <b>22.8</b> | <b>23.4</b> |
| $\delta$      | 41.4        | 41.4        |      |             |             |
| $\gamma$      | 173.4       | 172.1       | c    | <b>48.8</b> | <b>58</b>   |
| $\varepsilon$ | 23.3        | 23.3        | d    | 172.1       | 172.1       |
|               |             |             | e    | 41.3        | 41.3        |
|               |             |             | f    | 36          | 36          |
|               |             |             | g    | 133.5       | 133.5       |
|               |             |             | h    | 114.8       | 114.8       |
|               |             |             | i    | 147.2       | 147.2       |
|               |             |             | j    | 144.5       | 144.5       |
|               |             |             | k    | 117.2       | 117.2       |
|               |             |             | l    | 121.8       | 121.8       |

**Table SI2. Time-dependent <sup>1</sup>H-NMR-peaks for checking for a random incorporation of both monomers**

| Time of polymerization (min) | Average area Of H from phenyl group of catechol [-] | Average area of H from Nipam monomer [-] | Dopa concentration in copolymer [mol%] |
|------------------------------|-----------------------------------------------------|------------------------------------------|----------------------------------------|
| 15                           | 1.38                                                | 23.4                                     | 5.9                                    |
| 30                           | 1.18                                                | 19.75                                    | 5.7                                    |
| 45                           | 1.07                                                | 19.78                                    | 5.4                                    |
| 60                           | 0.86                                                | 16.52                                    | 5.2                                    |
| 180                          | 0.80                                                | 16.34                                    | 4.9                                    |

**Rheological temperature ramps for the determination of the LCST-processes.**

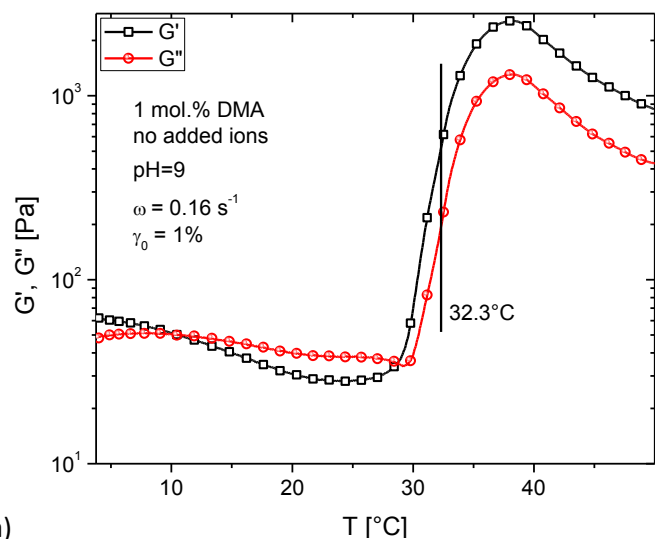

a)

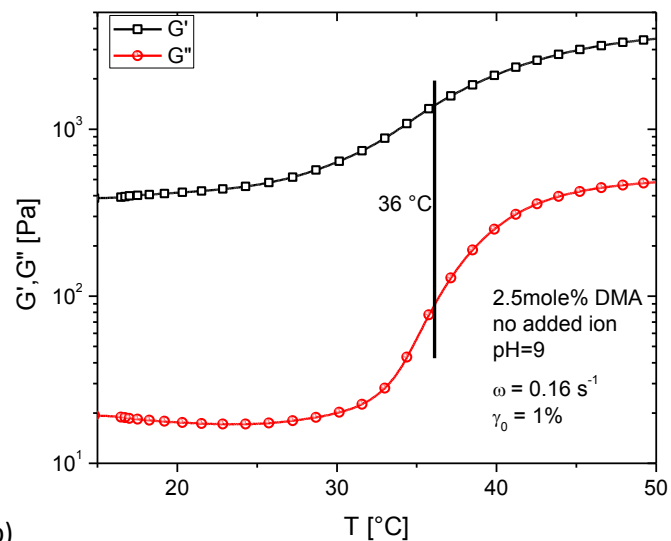

b)

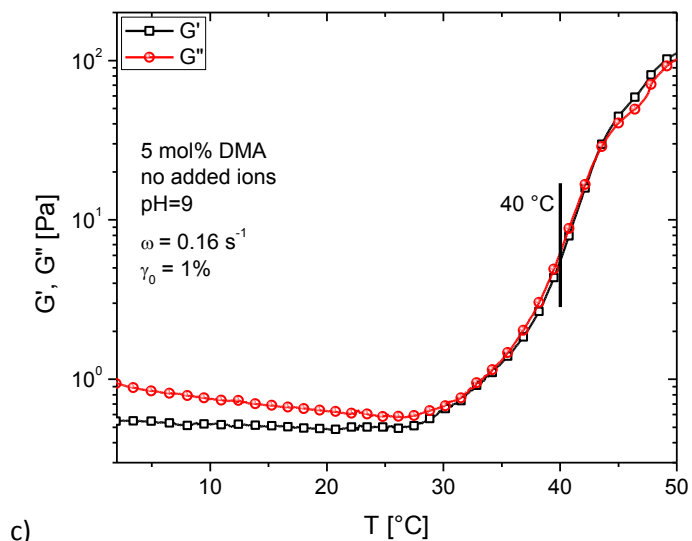

c)

Figure S11: Temperature dependence of copolymer at pH=9 without added ions a) NIDO1%, b) NIDO 2.5%, c) NIDO 5%.

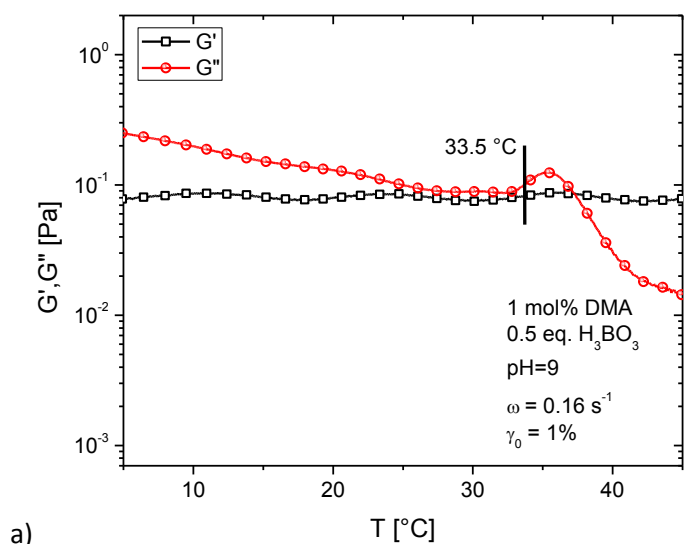

a)

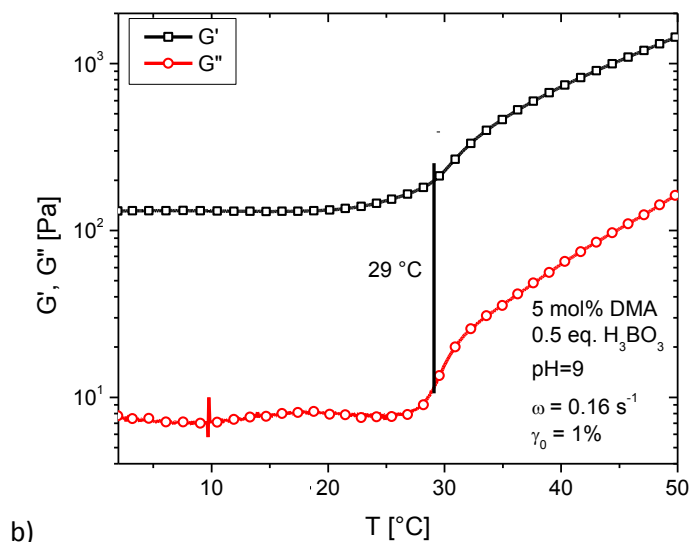

b)

Figure S12: Temperature dependence of copolymer at pH=9 with 0.5 eq.  $\text{H}_3\text{BO}_3$  a) NIDO1%, b) NIDO 5%.

Please note that the data for NIDO2.5% at pH=9 with 0.5 eq.  $\text{H}_3\text{BO}_3$  is included in Figure 8a in the main article.

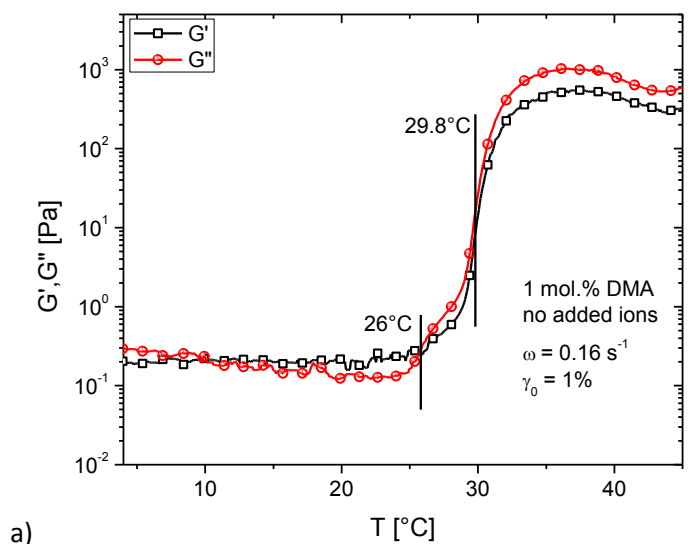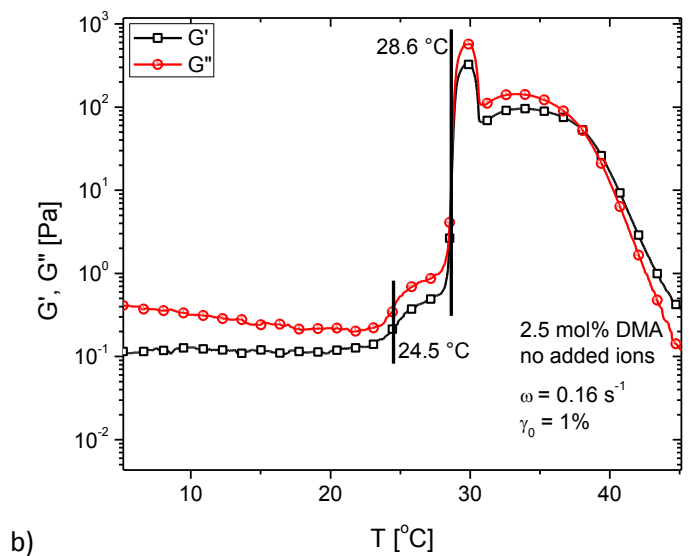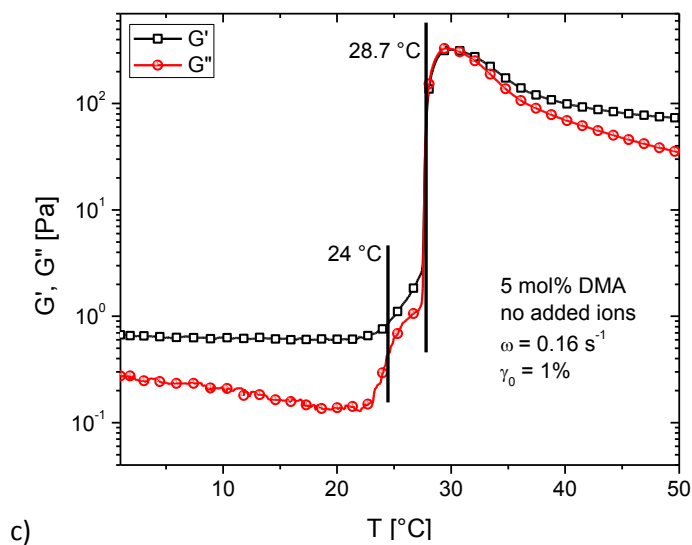

Figure S13: Temperature dependence of copolymer at pH=3 without added ions a) NIDO1% b) NIDO 2.5% c) NIDO 5%.

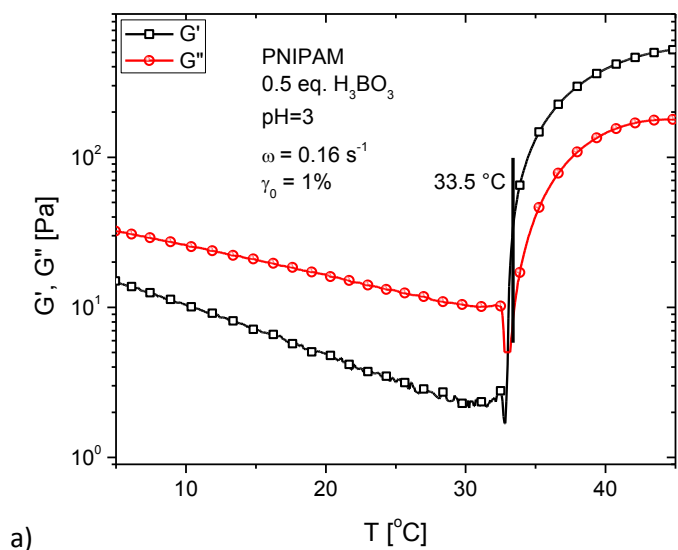

a)

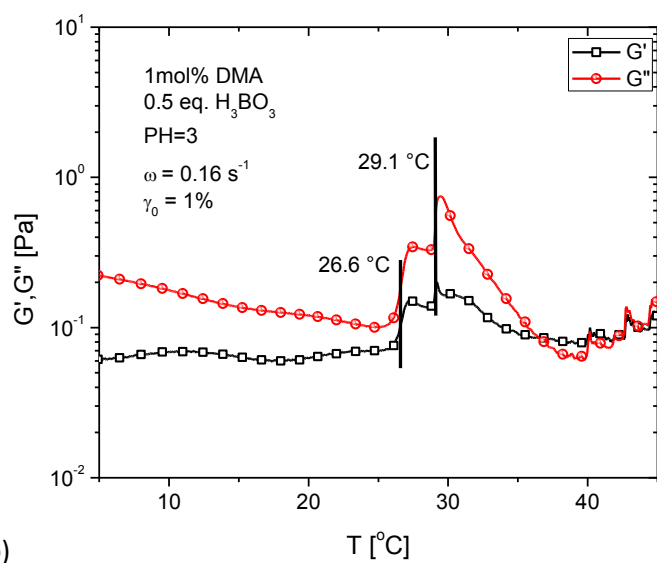

b)

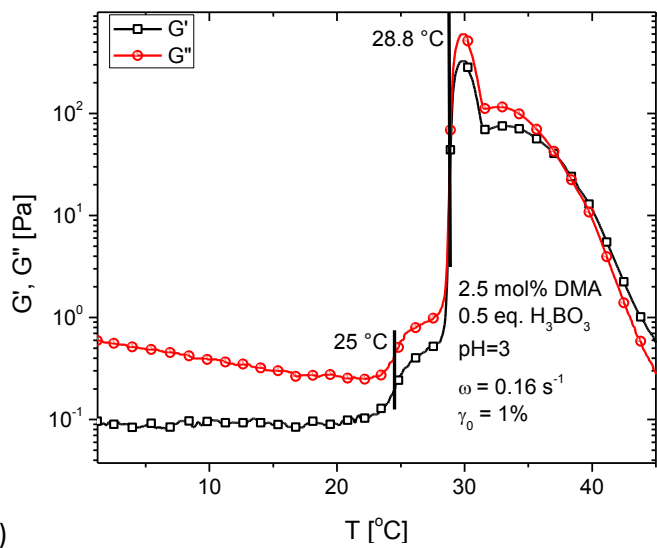

c)

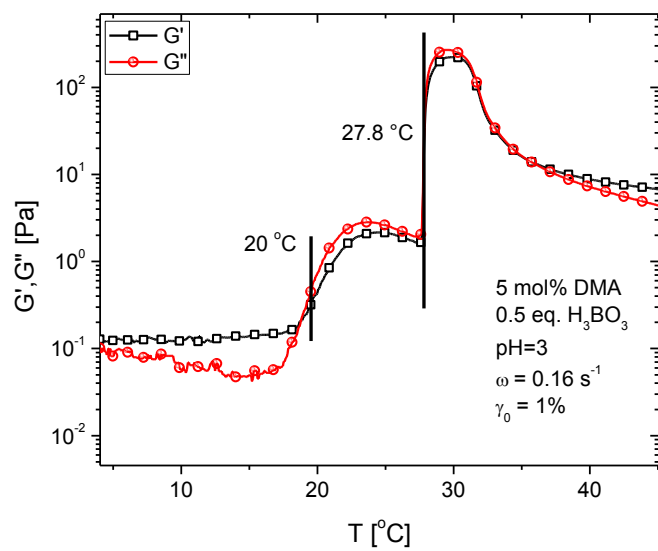

d)

Figure S14: Temperature dependence of copolymer at pH=3 with 0.5 eq.  $\text{H}_3\text{BO}_3$  a) PNIPAM, b) NIDO1%, c) NIDO 2.5%, d) NIDO 5%.
